# Supplementary material for: Photoelectrochemical evaluation of pH effect on hole transport through triplex-forming DNA immobilized on a gold electrode
Source: Royal Society of Chemistry journal article supplement (doi:10.1039/b800295a), 2008-01-01
Supplement: b800295a.pdf [file b800295a.pdf]

**Electronic Supplementary Information**

**Photoelectrochemical Evaluation of pH Effect on Hole Transport  
through Triplex-Forming DNA Immobilized on a Gold Electrode**

Ken-ichi Haruna,\* Haruka Iida, Kazuhito Tanabe,\* and Sei-ichi Nishimoto\*

*Department of Energy and Hydrocarbon Chemistry, Graduate School of Engineering,*

*Kyoto University, Katsura Campus, Kyoto 615-8510, Japan*

\*corresponding author. Phone: +81-75-383-2500. FAX: +81-75-383-2501,

e-mail: [hrn@pg.highway.ne.jp](mailto:hrn@pg.highway.ne.jp), [tanabeka@scl.kyoto-u.ac.jp](mailto:tanabeka@scl.kyoto-u.ac.jp), [nishimot@scl.kyoto-u.ac.jp](mailto:nishimot@scl.kyoto-u.ac.jp)

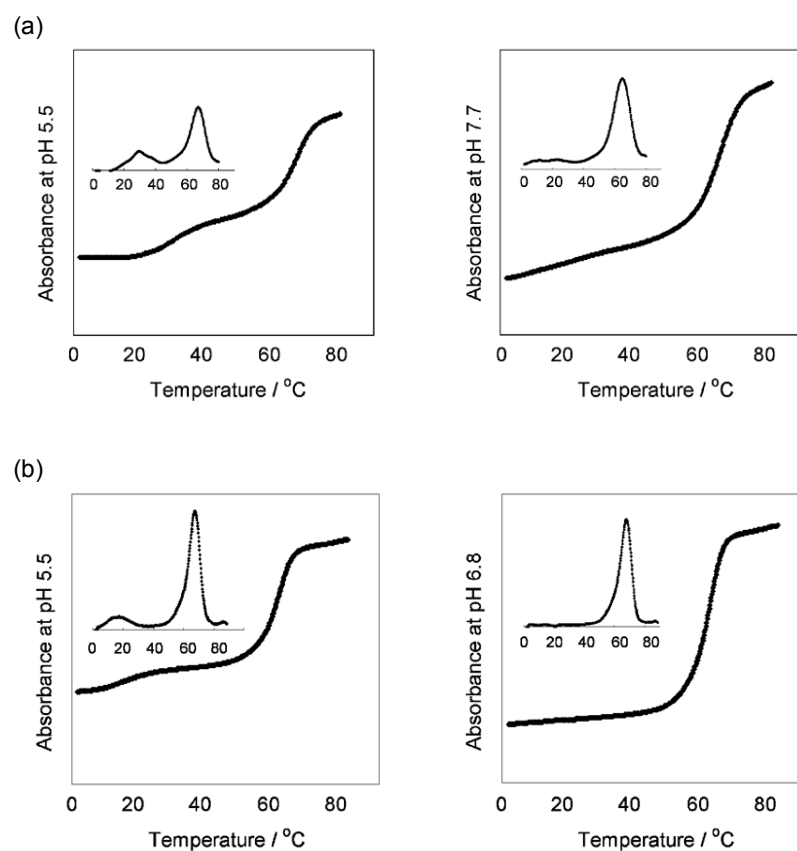

**Fig. S1.** UV melting curves measured at 260 nm for (a) **Triplex I** ODN 1/(AQ-ODN 2/ODN 3, 2.5  $\mu\text{M}$ ) at pH 5.5 (left) and 7.7 (right), (b) UV melting curves for **Triplex II** (AQ-ODN 4/ODN 5/ODN 6, 2.5  $\mu\text{M}$ ) at pH 5.5 (left) and 6.8 (right). Insets are the respective corresponding first-derivative curves.

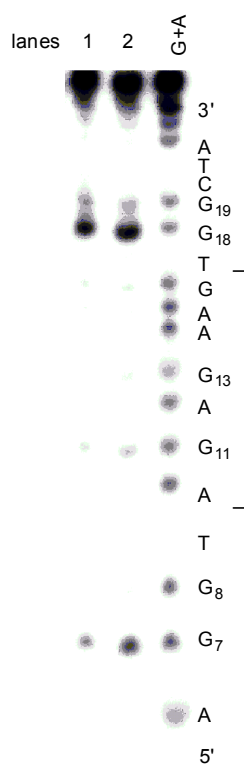

**Fig. S2.** Autoradiogram of a denaturing gel electrophoresis for  $^{32}\text{P}$ -5'-end labeled ODN 4 after photooxidation of **Triplex II** (ODN 4/ODN 5/ODN 6). Each sample in 10 mM sodium cacodylate containing 2 mM  $\text{MgCl}_2$  was 365-nm irradiated at 0 °C followed by hot piperidine treatment. Lanes 1, irradiation for 60 min at pH 5.5; lane 2, irradiation for 30 min at pH 5.5 followed by irradiation for 30 min at pH 6.8. The lane labeled G + A is Maxam-Gilbert sequencing lane. The triplex-forming site is indicated by a bracket.
